1 Type of article: research article

2

3 Running header: A globally invasive sponge

4

5 **The marine sponge *Hymeniacidon perlevis* is a globally-distributed invasive species**

6

7 **Thomas L. Turner**

8 Ecology, Evolution, and Marine Biology Department

9 University of California, Santa Barbara

10 Santa Barbara, CA 93106

11

12 tltturner@ucsb.edu

13

14 ORCID: 0000-0002-1380-1099

15

16 **Abstract**

17 In Elkhorn Slough, a tidal estuary draining into Monterey Bay, California, the intertidal is  
18 dominated by an orange sponge known by the name *Hymeniacidon sinapium*. This same  
19 species is common in the rocky intertidal in California, and fresh collections described  
20 here find this species throughout mainland kelp forest in Southern California. Farther  
21 afield, morphologically and ecologically indistinguishable sponges are among the most  
22 conspicuous occupants of estuaries and intertidal areas in Asia, Europe, South America,  
23 and Africa. Here I use morphological, ecological, and genetic data to show that these  
24 incredibly abundant sponges are all members of the same globally-distributed species,  
25 which should be known by the senior synonym *H. perlevis*. Though previous authors  
26 have remarked upon the morphological, ecological, and/or genetic similarity of various  
27 distant populations, the true scope of this sponge's distribution appears to be  
28 unrecognized or unacknowledged in the literature. Limited larval dispersal, historically  
29 documented range expansion, and low genetic variation all support a hypothesis that this  
30 sponge has achieved its extraordinary range via human-mediated dispersal, making it the  
31 most widely-distributed and abundant invasive sponge known to date.

32

33 **Keywords**

34 Porifera, sponges, invasive species, kelp forest, intertidal, estuaries

35

36 **Declarations**

37 Conflicts of interest/Competing interests: none to declare

38

39 Availability of data and material: All raw data is included as supplementary files;  
40 georeferenced collection data is available as a supplementary .xls file; genetic data are  
41 archived at Genbank; specimen vouchers are archived at the California Academy of  
42 Sciences and at the Natural History Museum of Los Angeles; specimen photos will be  
43 made available as supplementary files, are also archived by the associated museums in  
44 GBIF, and are posted as georeferenced data on iNaturalist.org.

45

46 Code availability: n/a

## 47 **Introduction**

48 In coastal marine ecosystems, filter-feeding marine invertebrates are among the most  
49 important invasive species in terms of species diversity, biomass, and ecological impacts  
50 (Ruiz et al. 2000; Bax et al. 2003; Byrnes and Stachowicz 2009). Sponges (phylum  
51 Porifera) are a diverse group of filter-feeding organisms that are found in all marine  
52 environments. They provide unique ecosystems services (and potential disruptions)  
53 because they preferentially consume the smaller size fractions of the plankton, such as  
54 bacterial plankton (Reiswig 1971; Maldonado et al. 2012). They can also have major  
55 affects on nutrient cycling, as some sponges convert dissolved nutrients into particulate  
56 matter available to other animals (de Goeij et al. 2013).

57  
58 Our understanding of invasive sponges has been limited by an incomplete taxonomy.  
59 Sponges have simpler morphologies than most animals, confounding traditional  
60 classification schemes (Morrow and Cárdenas 2015). Many species were initially  
61 described as having a wide geographic range, but in recent decades these taxa have been  
62 recognized as clades comprised of multiple species with similar morphologies (Knowlton  
63 1993; Xavier et al. 2010). This is consistent with what is known about larval dispersal in  
64 sponges. All known sponge larvae are lecithotrophic, meaning that they have no ability to  
65 feed until they settle and develop into juveniles (Maldonado 2006). They have a short  
66 planktonic life, lasting from minutes to a few days (Maldonado 2006). Some sponges,  
67 however, do seem to have broad geographic ranges, and this is likely due to human-  
68 mediated transport. Carballo et al. (2013) list 7 species thought to have recent range  
69 expansions, including two that have moved between the Pacific and Atlantic basins  
70 (Carballo et al. 2013). Some of these species are likely to have been accidentally  
71 introduced with aquaculture (Henkel and Janussen 2011; Fuller and Hughey 2013).  
72 Trawling, hull-fouling, and other actives also likely play a role (Carballo et al. 2013).

73  
74 In the current work, I describe what appears to be the most common and widely  
75 distributed invasive sponge known to date. Genetic and morphological data support a  
76 distribution that includes Europe, the Atlantic coasts of North and South America, the  
77 Pacific coast of North America, and Asia. Morphological data suggest it is also present in  
78 New Zealand, Southwest Africa, and the Pacific coast of South America, but genetic data  
79 are not yet available from these populations. In much of this range, it is among the most  
80 common sponges in multiple habitats. In Europe, this species is known as *Hymeniacidon*  
81 *perlevis* (Montagu 1814). The range of *H. perlevis* was already thought to be substantial:  
82 from Norway in the North to the Macronesian Islands off Africa in the South (Erpenbeck  
83 and Van Soest 2002). Within this range it is found in diverse habitats, including both the  
84 intertidal and the subtidal, and it can grow buried in sediment or on hard substrate  
85 (Erpenbeck and Van Soest 2002). It is often abundant in these habitats, and is considered  
86 to be one of the most common sponges in Europe (Erpenbeck and Van Soest 2002). It has  
87 been described by other taxonomists as also occurring in New Zealand (Bergquist 1961,  
88 1970) and as the most abundant intertidal sponge in Western South Africa (Samaai and  
89 Gibbons 2005), but these records were rejected from the consensus view (Van Soest et al.  
90 2020a), probably because limited dispersal ability seemed to make such a range  
91 implausible. Sponges from additional parts of the globe have been described as  
92 morphologically indistinguishable from *H. perlevis*, but in these cases taxonomists put

93 forth other names for these distant populations. For example, de Laubenfels described a  
94 sponge he named *Hymeniacidon sinapium* from California in 1930 (de Laubenfels 1930,  
95 1932). He acknowledged that "it is doubtful whether this is a new form", and went so far  
96 as to suggest that species with the names "*sanguinea*, *luxurians*, *caruncula*, *heliophila*,  
97 *sinapium*, and perhaps even more species" are in fact synonyms. Consistent with this  
98 prediction, the European species *sanguinea* and *caruncula* have been synonymized with  
99 *H. perlevis* (Van Soest et al. 2020a). The status of *H. luxurians* is unclear (Van Soest et al.  
100 2020b), but the other two species, *H. sinapium* and *H. heliophila*, are still considered  
101 valid. In the current work, I will present evidence that *H. sinapium* is a junior synonym of  
102 *H. perlevis*, and that most sponges placed under the name *H. heliophila* are also *H.*  
103 *perlevis*.

104  
105 When describing *H. sinapium* in California, de Laubenfels remarked on its impressive  
106 ecological breadth. He described it as abundant in the "surf-beaten" intertidal throughout  
107 Southern California, but also the most abundant sponge on the oyster beds in Newport  
108 Bay (de Laubenfels 1932). (He reported only one sample from the subtidal, but his  
109 subtidal sampling was limited, primarily via trawling.) In contrast to this abundance in  
110 Southern California, de Laubenfels was only able to locate a single specimen of this  
111 species in Central California, so he described it as common only in the South. This is  
112 notable because he was based at Hopkins Marine Station in Monterey Bay (Central  
113 California), and this was the area that he studied most comprehensively. This makes it  
114 unlikely that this species was present in large numbers in Central California in the 1930s.  
115 Subsequently, however, it has become a dominant species in intertidal portions of  
116 Elkhorn Slough, which drains into Monterey Bay (Wasson et al. 2001), and it is also  
117 known from San Francisco Bay and Tomales Bay in Northern California (Wasson et al.  
118 2001; Fuller and Hughey 2013). Morphological (Sim 1985) and genetic (Hoshino et al.  
119 2008) comparisons later confirmed that a common *Hymeniacidon* in Korea, Japan, and  
120 China were the same species as those in California, so it was proposed that *H. sinapium*  
121 was introduced to California from Asia with oyster mariculture (Fuller and Hughey 2013).  
122 Though this is certainly possible, the data I compile here illustrates that it may also be  
123 non-native in Asia. This species has been said to occur in the Mexican Pacific (Hofknecht  
124 1978) and the Galapagos Islands (Desqueyroux-Faúndez and Van Soest 1997) as well,  
125 but genetic data are not yet available from those populations.

126  
127 The final species to consider, *H. heliophila* (Wilson 1911), is ascribed a substantial range  
128 in the Western Atlantic, from the Gulf of Maine to Argentina (Weigel and Erwin 2016;  
129 Van Soest et al. 2020c). Originally described as the most abundant sponge in Beaufort  
130 Harbor North Carolina (Wilson 1911), it is also said to be very common in the Caribbean  
131 (Diaz et al. 1993), and was recently described as the most common sponge in the  
132 intertidal in the Bahía San Antonio, Argentina (Gastaldi et al. 2018). In the latter case,  
133 however, the authors opted to refer to their samples by the name *H. perlevis*, as the  
134 Argentinian samples were indistinguishable from ones in Northern Europe in genotype,  
135 habitat, and morphology.

136  
137 Here, I build on these results by 1) analyzing additional samples from Southern  
138 California, which contains the type locality for *H. sinapium*, and 2) compiling all publicly

139 available genetic data (from 20 publications and several unpublished datasets). When  
140 presented together, the data provide a compelling case for a single species ranging across  
141 both the Atlantic and Pacific basins and the Northern and Southern hemispheres. Given  
142 the limited dispersal capabilities of the species (Xue et al. 2009), the limited genetic  
143 variation over most of its range (see below), and the historically documented range  
144 expansion in California, these data are most consistent with an invasive spread via human  
145 facilitation.

146

## 147 **Methods**

148

### 149 *Collections*

150 Sponges were located while SCUBA diving. Effort was made to photo-document all  
151 sponge morphotypes present at each dive site, so that data on presence vs. absence could  
152 be compiled. It should be noted, however, that search time was higher at some sites than  
153 others, as shown in supplementary table 1. The search times listed are the total dive time,  
154 cumulative across all dives at a site. This only approximates search effort, as some dives  
155 were spent mainly searching and photographing sponges, while on others considerable  
156 time was spent collecting samples. Collections were made by hand with a small knife.  
157 Samples were placed individually in ziplock bags while underwater, accompanied with  
158 copious seawater. These bags were put on ice until preservation, which was generally  
159 within 2-5 hours, but sometimes up to 12 hours. Samples were moved directly from  
160 seawater to 95% ethanol; in most cases, the preservative was changed with fresh 95%  
161 ethanol after 1-3 days, and sometimes changed again if it remained cloudy. Most samples  
162 were photographed underwater with an Olympus TG5 before collection and  
163 photographed again in the lab. These photos accompany this paper as supplementary data  
164 and are also posted as georeferenced records on the site iNaturalist.org. Two samples  
165 were collected during the "LA Urban Ocean Bioblitz", and are present as vouchers at the  
166 Natural History Museum of Los Angeles. Three other samples were vouchered with the  
167 California Academy of Sciences in San Francisco. Voucher numbers are shown in  
168 supplementary table 1. This table lists all samples known or suspected to be  
169 *Hymeniacidon sinapium*: note that the standard of evidence is variable in each case, as  
170 indicated in the table (e.g. some were photographed but not collected, and the ID is  
171 therefore tentative; see results for further details).

172

### 173 *Spicules*

174 Sponge spicules were examined by digesting soft tissues in bleach. A subsample of the  
175 sponge was chosen, taking care to include both the ectosome and choanosome. This was  
176 placed in a 1.5 ml microcentrifuge tube with household bleach for several hours, until  
177 tissue appeared to be dissolved. With the spicules settled at the bottom of the tube, the  
178 bleach was then pipetted off and replaced with distilled water; this was repeated several  
179 times (I found that 2-3 times was sufficient for visualizing spicules with a light  
180 microscope, but removing all the salt from the sample for other downstream applications  
181 required 5 or more rinses and worked best when the final ones were done with absolute  
182 ethanol). In some cases, samples were centrifuged at low speed to reduce settling time  
183 between rinses, though this increased the proportion of broken spicules.

184

185 Spicules were imaged using a compound triocular scope and pictures were taken using a  
186 D3500 SLR camera (Nikon) with a NDPL-1 microscope adaptor (Amscope). Pictures of  
187 a calibration slide were used to determine the number of pixels per mm, and 20-30  
188 spicules were then measured using ImageJ (Schneider et al. 2012). Effort was made to  
189 select sets of spicules without respect to their size, so as to get an unbiased estimate of  
190 size distributions. All raw data are available as supplementary table 2. Spicule photos are  
191 available in the supplementary data that accompanies this paper, and have been linked to  
192 georeferenced records at iNaturalist.org.

193  
194 I also imaged the spicular architecture in cleared tissue sections. I used a razor blade to  
195 cut perpendicular sections that were as thin as possible by hand, and removed the  
196 ectosome by hand for a surface view. These sections, already in 95% ethanol, were  
197 soaked in 100% ethanol for a short time and then cleared for several hours in HistoClear  
198 (National Diagnostics). These photos are available in the supplementary data that  
199 accompanies this paper, and have been linked to georeferenced records at iNaturalist.org.

200  
201 *Genotyping*  
202 DNA was extracted from small subsamples, taking care to minimize contamination by  
203 the many sponge-associated organisms that are often present. Some samples were  
204 extracted with the Qiagen Blood & Tissue kit while the others were extracted with the  
205 Qiagen Powersoil kit. The "barcoding" region of the *cox1* gene was amplified using the  
206 Folmer primers LCO1490 (GGTCAACAAATCATAAAGAYATYGG) and HCO2198  
207 (TAAACTTCAGGGTGACCAAARAAYCA) (Folmer et al. 1994). A single attempt was  
208 made to amplify a longer region using the primers from Rot et al. (Rot et al. 2006):  
209 LCO1490 and COX1-R1 (TGTTGRGGGAAAAARGTTAAATT) but without success. A  
210 portion of the 18S locus was amplified using the primers SP18aF  
211 (CCTGCCAGTAGTCATATGCTT) and 600R18S (CGAGCTTTTAACTGCAA)  
212 (Redmond et al. 2013); the C2-D2 region of 28S was amplified using primers C2  
213 (GAAAGAACTTTGRARAGAGAGT) and D2 (TCCGTGTTTCAAGACGGG)  
214 (Chombard et al. 1998). All primer sequences are listed 5' to 3'. PCR was performed in a  
215 Biorad T100 thermocycler with the following conditions: 95C for 3 min, followed by 35  
216 cycles of 94C for 30 sec, 52C for 30 sec, 72C for 1 min, followed by 72C for 5 minutes.  
217 The C2-D2 28S region was amplified with a 57C annealing temperature instead of 52C.  
218 PCR was performed in 50  $\mu$ l reactions using the following recipe: 24  $\mu$ l nuclease-free  
219 water, 10  $\mu$ l 5x PCR buffer (Gotaq flexi, Promega), 8  $\mu$ l MgCl<sub>2</sub>, 1  $\mu$ l 10mM dNTPs  
220 (Promega), 2.5  $\mu$ l of each primer at 10  $\mu$ M, 0.75 bovine serum albumin (10 mg/ml, final  
221 conc 0.15 mg/ml), 0.25  $\mu$ l Taq (Gotaq flexi, Promega), 1  $\mu$ l template. ExoSAP-IT  
222 (Applied Biosystems) was used to clean PCRs, which were then sequenced by Functional  
223 Biosciences using Big Dye V3.1 on ABI 3730xl instruments. All PCR products were  
224 sequenced in both directions, and a consensus sequence was constructed using Codon  
225 Code v.9 (CodonCode Corporation). Blastn was used to verify that the resulting traces  
226 were of sponge origin; all sequences have been deposited in Genabank as accessions  
227 MT007958-MT007960 (*cox1*), MT001298 (18S), and MT006362 (28S). See  
228 supplementary table 3 for additional details and information.

229  
230 *Genetic analysis*

231 I retrieved all sequences with high sequence similarity to *H. perlevis* from Genbank. I  
232 used the NCBI taxonomy browser to compile all data from samples identified as *H.*  
233 *perlevis*, *H. sinapium*, *H. heliophila*, and *H. flavia*. Together, these data are from 20  
234 different publications and several unpublished datasets (Erpenbeck et al. 2002, 2004,  
235 2005, 2006, 2007; Park et al. 2007; Hoshino et al. 2008; Turque et al. 2008; Erwin et al.  
236 2011; Alex et al. 2012, 2013; Morrow et al. 2013; Redmond et al. 2013; Thacker et al.  
237 2013; Fuller and Hughey 2013; Jun et al. 2015; Miralles et al. 2016; Weigel and Erwin  
238 2016; Gastaldi et al. 2018; Regueiras et al. 2019). I also retrieved all samples identified as  
239 *Hymeniacidon* sp. and checked these and other sequences using blastn for similarity to *H.*  
240 *perlevis/sinapium/heliophila*. Only four of these (JN093018 and KU697715-KU697717),  
241 all identified as *Hymeniacidon* sp., were closely related to the other samples, and all  
242 appeared to be identical to others sequences within the *H. perlevis* clade. These four  
243 unidentified samples were not included in downstream analyses.

244  
245 I was not able to use all sequences in every analysis because of differences in the  
246 sequenced portion of the gene or a lack of information regarding collecting location.  
247 Importantly, no samples were excluded simply because they showed discordant patterns  
248 of sequence variation. Supplementary table 3 lists every Genbank accession found,  
249 indicates which were included in each analysis, and explains the reasons why any were  
250 excluded. Some reads were included in the phylogenetic analysis, which could account  
251 for unequal read lengths, but not the haplotype network, which included only samples  
252 with complete data over the entire alignment. Sequence alignments were produced in  
253 Codon Code v.9 (CodonCode Corporation). Haplotype networks were produced using the  
254 minimum spanning method (Bandelt et al. 1999) as implemented in Popart (Leigh and  
255 Bryant 2015). Phylogenies were estimated with maximum likelihood using IQ-Tree  
256 (Nguyen et al. 2015; Trifinopoulos et al. 2016). I used a GTR model of sequence  
257 evolution and used the Ultrafast bootstrap (Hoang et al. 2018) to measure node  
258 confidence. Phylogenies were produced from the IQ-Tree files using the Interactive Tree  
259 of Life webserver (Letunic and Bork 2019). Figures were made ready for publication  
260 using R (r-project.org) and/or Gimp (gimp.org).

261

## 262 **Results**

263

### 264 *Status in Southern California*

265 Little data has been published about the distribution of *H. sinapium* in California outside  
266 of bays and estuaries. Past surveys have focused on intertidal habitat and/or subtidal  
267 sampling via deep water trawl (de Laubenfels 1932; Sim and Bakus 1986; Bakus and  
268 Green 1987; Green and Bakus 1994). It was therefore unknown if *Hymeniacidon*  
269 *sinapium* is present in kelp forest ecosystems. I searched for it using SCUBA at 47 sites  
270 in Southern and Central California (table S1). Subtidal sites were shallow rocky reefs  
271 except for two locations which were oil platforms. Subtidal sites include four marine  
272 protected areas along the mainland coast and three marine protected areas within the  
273 Channel Islands National Marine Sanctuary. Six of the sites are also field sites within the  
274 Santa Barbara Coastal Long-Term Ecological Research Network (sbclter.msi.ucsb.edu).  
275 Though the survey was focused on kelp forest habitats, I also checked two intertidal sites  
276 and floating docks in two harbors, as shown in table S1.

277

278 The distribution of *H. sinapium* in the Channel Islands region, where sampling was most  
279 comprehensive, is shown in figure 1. I found the sponge at 8 of 19 mainland reefs in  
280 Southern California, including both mainland marine protected areas investigated in  
281 Southern California (Naples and Campus Point Marine Protected Areas). In only one  
282 location (Carpinteria Reef) did I find *H. sinapium* growing on rock; in all other locations  
283 it was largely buried in sediment, with projections extending into the water column. In  
284 contrast to its prevalence on the Southern California mainland, I did not find it at any  
285 island sites. This difference seems unlikely to be due to dispersal limitation because  
286 island and mainland sites have high connectivity (Watson et al. 2010). It is more likely  
287 due to the ecological differences between sites: none of the island sites investigated had  
288 areas with the fine silty sediment where the sponge was most common on the mainland.  
289 Though silty sites at the islands may simply have been unsampled in this survey, it is  
290 likely they are less common than on the mainland. For example, satellite data show that  
291 particles at the islands are less prone to resuspension by wave action (Freitas et al. 2017).  
292 An intertidal survey of island sites in the 1970s did find *H. sinapium* at both San Miguel  
293 and Santa Rosa Islands (Bakus and Green 1987). It has also been reported from the more  
294 Southern islands of Catalina and San Clemente, which were barely sampled by my survey  
295 (Sim and Bakus 1986; Bakus and Green 1987). To the North, in Central California, I only  
296 surveyed three subtidal sites. I did not find *H. sinapium* in any of these Central California  
297 sites, nor did I find it at the few intertidal sites, floating docks, or oil rigs that were  
298 checked.

299

300 Together, my recent collections and the published intertidal and bay surveys in California  
301 produce a portrait of a species that thrives in a wide variety of conditions, from bays to  
302 the rocky intertidal to the kelp forest (Lee et al. 2007). It seems to dominate the intertidal  
303 in some bay habitats with a muddy substrate and high sedimentation, and seems more  
304 common in the kelp forest where fine sediment is found. These data are completely  
305 consistent with the published descriptions of habitat preferences for *H. perlevis* in Europe  
306 (Erpenbeck and Van Soest 2002) and *H. heliophila* in the Western Atlantic (Weigel and  
307 Erwin 2016).

308

### 309 *Gross Morphology of kelp forest samples*

310 All but one of the newly collected samples were found embedded in sediment with  
311 irregular projections extending into the water column. These projections varied from  
312 stout cone-shaped or bag-shaped oscula to long, tendril-like digitations. One sponge was  
313 found unburied, growing on rock. It lacked projections and instead resembled  
314 *Halichondria panicea* (its identity was confirmed with spicule and DNA data, presented  
315 below). All samples had a fleshy consistency, with the rock-dwelling sponge somewhat  
316 more firm. Color varied from yellow to yellowish-orange in the field. Field photos are  
317 available for 8 samples in the supplementary data accompanying this paper, and are also  
318 available at iNaturalist.org.

319

320 I was interested in whether these sponges could be identified in the field and therefore  
321 monitored using roving diver surveys or photo transects. These samples were collected as  
322 part of an ongoing project to characterize the diversity of kelp forest sponges, with over

323 500 samples collected to date. This is the first survey of sponges in California via  
324 SCUBA, and the first with extensive field photos of specimens that have also been  
325 analyzed morphologically. Though the bulk of these data will be published elsewhere,  
326 comparisons to date indicate that *H. sinapium* is the only sponge in these habitats that  
327 grows by extending irregularly shaped projections out of silty sediment. Though this  
328 morphology is certainly known from other species, *H. sinapium* was the only sponge with  
329 this morphology found within the sampling effort shown in supplementary table 1. This  
330 indicates that this morphology, when found in the Southern California kelp forest, is  
331 strongly suggestive of the presence of this species. The most similar species found to date  
332 is *Polymastia pachymastia*: as the name suggests, this sponge is covered in nipple-like  
333 projections. This sponge was also found covered in sediment, with only the projections  
334 visible. However, these projections tend to be uniform in shape and regularly spaced in *P.*  
335 *pachymastia*, which contrasts with the irregularly spaced and morphologically various  
336 projections seen in *H. sinapium*. The projections are also nearly white in *P. pachymastia*,  
337 while they vary from yellow to nearly orange in *H. sinapium* (field photos of both species  
338 have been deposited at iNaturalist.org). The rock-dwelling *H. sinapium* found at  
339 Carpenteria Reef, however, would be more challenging to identify from field photos, as it  
340 is very similar to other Halichondridae found in the survey.

341

#### 342 *Spicular morphology*

343 I characterized the spicules of 9 samples to confirm their identity and compare them to  
344 published data. All spicules were styles: tapered to a point at one end, and rounded at the  
345 other. Width was usually uniform over the entire length, but a small minority had faint  
346 swelling at or near the rounded end. This was manifest as a very weak swollen head  
347 including the end (similar to the head of a match), or more commonly as a swollen band  
348 near the head end (like a bead on a string). Most were somewhat curved or bent. The  
349 skeleton of one sample was investigated further using hand-cut sections cleared with  
350 Histoclear. Spicules in perpendicular sections through the choanosome formed wavy,  
351 meandering tracts, the largest of which were about 30  $\mu\text{m}$  wide. Spicules were also found  
352 outside the tracts pointing in all directions (referred to as a "confused" arrangement in  
353 sponge taxonomy). Surface sections revealed that the surface layer (ectosome) of the  
354 sponge was filled with spicules that appeared to be tangential (parallel to the sponge  
355 surface) and also "paratangential" (at an angle to the surface of less than 90 degrees).  
356 These spicules were in messy bundles that formed an approximate mesh on the surface of  
357 the sponge. Table 1 shows measurements of spicules as compared to values published in  
358 other studies of *Hymeniacidon*. Newly collected data are consistent with published data  
359 from *H. sinapium*, *H. perlevis*, and *H. heliophila*, as well as *H. fernandesi* (Thiele 1905)  
360 from Chile (for which no genetic data is yet available). The arrangement of spicules in  
361 cleared sections is also congruent with the spicular architecture described for *H. perlevis*  
362 and other species (Erpenbeck and Van Soest 2002). Photos of tissue sections and spicules  
363 are available as supplementary data.

364

#### 365 *Genetic analysis*

366 I sequenced the newly collected samples at the *cox1* locus (3 samples), the 18S rDNA (1  
367 sample) and the 28S rDNA (1 sample). The *Hymeniacidon sinapium* holotype was also  
368 loaned to me by the Smithsonian Natural History Museum: despite repeated attempts, I



369 was unable to amplify DNA from this sample. This is not surprising, as it was collected  
370 in 1926 and little is known about its initial preservation.

371  
372 I mined Genbank for all DNA data available for *H. perlevis*, *H. sinapium*, and *H.*  
373 *heliophila* (see methods). I generated sequence alignments for four loci: *cox1*, 18S rDNA,  
374 28S rDNA, and a locus spanning the first intergenic transcribed spacer, the 5.8S rRNA,  
375 and the second intergenic transcribed spacer (hereafter referred to as the ITS). No other  
376 locus had more than 2 sequences available in Genbank from any of these taxa.  
377 Preliminary phylogenies indicated that sequences of *Hymeniacidon flavia* were more  
378 closely related to the clade containing my target species than anything else in Genbank.  
379 When available, these sequences were included for comparison.

380  
381 Figure 2 shows the haplotype networks for the three loci with the most data. A large  
382 dataset was available for 226 base pairs at the ITS locus. A set of 271 sponges from Japan  
383 and Korea contained little genetic variation, as previously described (Park et al. 2007;  
384 Hoshino et al. 2008). Samples from Northern, Central, and Southern California were all  
385 identical to the most common Asian haplotype, as were 9 of 10 samples of *H. heliophila*  
386 from the Eastern United States. These include samples from Alabama, Florida, and,  
387 importantly, North Carolina. This last sequence read is the only one available that is  
388 identified as coming from this state, which contains the type location for *H. heliophila*.  
389 As a useful comparison to the diversity in 298 samples of *perlevis/heliophila/sinapium*, a  
390 population sample of 212 *H. flavia* are shown. These are all from Japan, yet they contain  
391 a similar amount of diversity as the worldwide sample from the other species.

392  
393 A large mitochondrial dataset is also available at the Folmer barcoding region of the *cox1*  
394 locus (571 bp; fig. 2). A single haplotype was shared among populations from China,  
395 Korea, Southern California, Florida, and Portugal. Samples from Argentina contained  
396 only 1-2 differences (99.6% identity) compared to this world-wide haplotype. The only  
397 sample that is more than 0.5% divergent from this common haplotype, out of all *H.*  
398 *perlevis/sinapium/heliophila* available, is a single sequence from Rio de Janeiro, Brazil  
399 (1.2% divergent; top of fig. 2). No morphological description of this sample is available  
400 in the related publication (Turque et al. 2008), but it states that vouchers were deposited  
401 in the Museu Nacional, Universidade Federal do Rio de Janeiro. This sample is discussed  
402 further below.

403  
404 Less data is available for the 18S and 28S rDNA loci, but the 18S locus once again  
405 illustrates the genetic similarity of Atlantic *H. perlevis/heliophila* populations and Pacific  
406 *H. sinapium* populations (fig). Over the aligned 1,642 bp, samples from China shared an  
407 identical haplotype with samples from Argentina. A sample of *H. perlevis* from Ireland,  
408 the type locality for that species, differs by only a single base pair. Only a single data  
409 point has any notable divergence: a sponge identified as *H. heliophila* from the USA.  
410 This sample is separated from all others by 12 substitutions (0.7% divergence). I created  
411 a phylogeny including selected other Halichondridae to place this divergence in context  
412 (figure 3). While all other sequences of *H. heliophila/sinapium/perlevis* form a clade, this  
413 USA sample is as divergent as other distinct species. The interior nodes of this phylogeny  
414 are not well resolved, but it is clear that this sequence is an outlier and likely from a

415 different species. This sample (NCI217, Smithsonian voucher #0M9G1074-H) is part of a  
416 collection of sponges for the National Cancer Institute deposited at the Smithsonian  
417 Museum of Natural History (Redmond et al. 2013). It was collected by the Coral Reef  
418 Research Foundation in the Florida Keys (Key Largo, from mud substrate), and identified  
419 by Belinda Glasby (William Moser, Smithsonian Museum of Natural History, pers.  
420 comm.). It is discussed further below.

421  
422 The D3-D5 region of 28S also allowed for an interesting comparison (figure 3). The only  
423 data available at this locus is from two European samples and two from the Florida Keys,  
424 USA. One of the Florida sequences is from the same isolate as the outlier at 18S  
425 (NCI217), while the other sample is from the same collection (NCI083, Smithsonian  
426 voucher #0M9G1369-A) (Thacker et al. 2013). It was collected in the Florida Keys  
427 (Marquesas Key, sand substrate; William Moser, pers. comm.) In agreement with the 18S  
428 data, these samples do not appear to be from the same species as the European ones.

### 429 430 **Discussion**

431 Genetic data provide strong support for the synonymy of *H. perlevis* and *H. sinapium*.  
432 The type locality for *H. sinapium* is Newport Bay, in Southern California (de Laubenfels  
433 1932). Previously, the only genetic data from Southern California was from a single  
434 sample from Mission Bay, roughly 140 km to the South of the type location. To this I  
435 have added additional data from Santa Barbara County (200 km North of the type  
436 location). All of these samples are identical to samples of *H. perlevis*. Indeed, there is no  
437 appreciable genetic divergence between any sample from California, Japan, Korea or  
438 Europe. I therefore formally propose that *H. sinapium* de Laubenfels (1930) be  
439 considered a junior synonym of *H. perlevis* Montagu (1814).

440  
441 It is likely that *H. heliophila* is also a junior synonym of *H. perlevis*, but some ambiguity  
442 remains. Genetic data illustrate that the majority of samples identified as *H. heliophila*  
443 are in fact *H. perlevis*, including the only one from North Carolina, which contains the  
444 type location. The two National Cancer Institute vouchers from Florida, however, appear  
445 to be from a different species. One *cox1* sequence from Brazil is also modestly divergent,  
446 and could be from another species. It is possible that these samples were merely  
447 misidentified, as no public data exist on their spicular morphology, and I have not  
448 examined the vouchers. Another possibility is that there are two morphologically similar  
449 *Hymeniacion* within the range ascribed to *H. heliophila*, mirroring the case of *H.*  
450 *sinapium* and *H. flavia* in Japan. Though further work will be required to determine if the  
451 name *H. heliophila* is valid, it is clear that the most common sponge matching its  
452 description is in fact *H. perlevis*, whose range therefore includes North Carolina, Florida,  
453 Alabama and Argentina at the very least.

454  
455 Ecological and morphological data also support these far-flung populations being within  
456 the same species. It should be noted, however, that there is another species that is  
457 morphologically similar yet genetically distinct. The genetic outgroup to the *H.*  
458 *perlevis/heliophila/sinapium* clade is *H. flavia*, known from Japan and Korea (Park et al.  
459 2007; Hoshino et al. 2008). This species is sympatric with *H. sinapium* in Japan, and  
460 cannot be distinguished from it based on spicular morphology. These species can only be

461 identified using genetic data, color when alive, or larval morphology (Sim and Lee 2003;  
462 Hoshino et al. 2008). This illustrates that it may be difficult to resolve the taxonomy of  
463 *Hymeniacidon* without genetic data. As pointed out by Gastaldi et al. (Gastaldi et al.  
464 2018), there are additional species with morphological descriptions matching *H. perlevis*,  
465 but the existence of *H. flavia* illustrates that confidently determining which are synonyms  
466 will require DNA data.

467

468 Data on larval biology are available for *H. perlevis*, and they support a hypothesis of  
469 recent range expansion via human facilitation. Larvae of *H. perlevis* are non-tufted  
470 parenchymella, and do not appear to differ in their dispersal time compared to other  
471 studied species (Xue et al. 2009). In the lab, all larvae stopped swimming and were  
472 exploring the benthos by 19 hours after release, and all had settled by 43 hours. In  
473 unfavorable conditions the larvae may travel farther: under high artificial illumination  
474 (which increased mortality), sponge larvae swam for a maximum of 24 hours and some  
475 were still exploring the benthos when the experiment was terminated at 68 hours. These  
476 data are consistent with the larval ecology of other sponges (Maldonado 2006). It  
477 therefore seems unlikely that the larvae of this species are exceptional compared to other  
478 sponges, and could be naturally responsible for its exceptional range.

479

480 The data do not seem sufficient to form a strong hypothesis about the native range of this  
481 species. It seems unlikely to be California, as almost no genetic variation was found at  
482 the ITS or *cox1* loci. Moreover, the species has likely undergone range expansion in  
483 California between the 1920s and the present. Max de Laubenfels did extensive  
484 collecting in California in the 1920s, naming many new species. He was based at  
485 Stanford's marine station on Monterey Bay, but was only able to locate a single sample of  
486 *H. sinapium* in the area. The species is now the "dominant" intertidal organism in  
487 Elkhorn Slough, which drains into Monterey Bay; if this was true in the 1920s it seems  
488 unlikely to have been missed by de Laubenfels. Europe is perhaps the most likely source,  
489 as we know it was present there in the early 1800s. The genetic diversity at *cox1* in  
490 Portugal seems notably higher than the diversity at the ITS locus in Asia, though better  
491 support would clearly come from comparing data from the same locus.

492

493 Future work will be needed to understand what impact this species has on the ecosystem  
494 services provided by the communities in which it resides. Its exuberant abundance in  
495 many habitats seems to make impacts likely, if for no other reason than the occupation of  
496 space (Wasson et al. 2001). It is also notable that it has successfully colonized the kelp  
497 forests in California, which have been relatively resistant to invasion (Steneck et al.  
498 2002). Within these kelp forests, my observations suggest that this species can be  
499 monitored, if imperfectly, using roving diver surveys or photo transects. Though some  
500 sponges would require follow-up confirmation in the lab, this might allow the existing  
501 large-scale monitoring efforts in California to include this species (Claisse et al. 2018;  
502 Miller et al. 2018).

503

504 The work presented here builds on the excellent previous work of many authors, and  
505 aspects of the pattern I describe have certainly been recognized by others. Hoshino et al.  
506 (2008) and Gastaldi et al. (2018) both remarked upon the similarity of *Hymeniacidon* in

507 the *H. perlevis* clade, though in both cases they referred to this clade as a species complex  
508 that might be synonymized in the future. Others have simply started referring to their  
509 samples by the senior synonym *H. perlevis*, even if they are within the range ascribed to  
510 one of the other taxa (Xue et al. 2009; Gastaldi et al. 2018). I build on these earlier efforts  
511 by adding data from Southern California and, for the first time, presenting all the genetic  
512 data from other projects in one analysis. I recommend synonymizing *H. sinapium* and *H.*  
513 *perlevis*, and recognizing that *H. perlevis* is an invasive species with a global distribution.  
514 My hope is that recognition of the unusual distribution and abundance of this species  
515 motivates further work into its ecology and ecological impacts.

516

### 517 **Acknowledgements**

518 I am grateful for the help and support of many people in UCSB's Marine Science Institute  
519 and Diving & Boating Program, especially Robert Miller, Clint Nelson, Christoph Pierre,  
520 Frankie Puetzer, Christian Orsini, H. Mark Page, and Alecia Dezzani. Steve Lonhart  
521 (NOAA) and Shannon Myers (UCSC) were instrumental in facilitating collections in  
522 Central California, and the Natural History Museum of Los Angeles' DISCO program  
523 facilitated collections in Los Angeles County.

524

### 525 **Funding declaration**

526 Financial support was provided by UCSB and by the National Aeronautics and Space  
527 Administration Biodiversity and Ecological Forecasting Program (Grant  
528 NNX14AR62A); the Bureau of Ocean Energy Management Environmental Studies  
529 Program (BOEM Agreement MC15AC00006); the National Oceanic and Atmospheric  
530 Administration in support of the Santa Barbara Channel Marine Biodiversity Observation  
531 Network; and the U.S. National Science Foundation in support of the Santa Barbara  
532 Coastal Long Term Ecological Research program under Awards OCE-9982105, OCE-  
533 0620276, OCE-1232779, OCE-1831937. The funders had no role in study design, data  
534 collection and analysis, decision to publish, or preparation of the manuscript.

535

### 536 **References**

- 537 Alex A, Silva V, Vasconcelos V, Antunes A (2013) Evidence of unique and generalist  
538 microbes in distantly related sympatric intertidal marine sponges (Porifera:  
539 Demospongiae). *Plos One* 8(11): e80653
- 540 Alex A, Vasconcelos V, Tamagnini P, Santos A, Antunes A (2012) Unusual Symbiotic  
541 Cyanobacteria Association in the Genetically Diverse Intertidal Marine Sponge  
542 *Hymeniacion perlevis* (Demospongiae, Halichondrida). *Plos One* 7(12): e51834
- 543 Bakus GJ, Green KD (1987) The distribution of marine sponges collected from the 1976-  
544 1978 Bureau of Land Management Southern California Bight program. *Bulletin of*  
545 *the Southern California Academy of Sciences* 86(2): 57–88
- 546 Bandelt H, Forster P, Röhl A (1999) Median-joining networks for inferring intraspecific  
547 phylogenies. *Molecular Biology and Evolution* 16(1): 37–48
- 548 Bax N, Williamson A, Aguero M, Gonzalez E, Geeves W (2003) Marine invasive alien

- 549 species: a threat to global biodiversity. *Marine Policy* 27(4): 313–323
- 550 Bergquist PR (1961) A collection of Porifera from Northern New Zealand, with  
551 descriptions of seventeen new species. *Pacific Science* 15(1): 33–48
- 552 Bergquist PR (1970) The marine fauna of New Zealand: Porifera, Demospongiae. Part 2  
553 (Axinellida and Halichondrida). *Bulletin New Zealand Department of Scientific and*  
554 *Industrial Research [Memoir New Zealand Oceanographic Institute]* 51: 9–85
- 555 Byrnes J, Stachowicz JJ (2009) Short and long term consequences of increases in exotic  
556 species richness on water filtration by marine invertebrates. *Ecology Letters* 12:  
557 830–841
- 558 Carballo JL, Aguilar-Camacho JM, Knapp IS, Bell JJ (2013) Wide distributional range of  
559 marine sponges along the Pacific Ocean. *Marine Biology Research* 9(8): 768–775
- 560 Chombard C, Boury-Esnault N, Tillier S (1998) Reassessment of homology of  
561 morphological characters in tetractinellid sponges based on molecular data.  
562 *Systematic Biology* 47: 351–366
- 563 Claisse JT, Blanchette CA, Dugan JE, Williams JP, Freiwald J, II DJP, Schooler NK,  
564 Hubbard DM, Davis K, Zahn LA, Williams CM, Caselle JE (2018) Biogeographic  
565 patterns of communities across diverse marine ecosystems in southern California.  
566 *Marine Ecology* 39(S1): e12453
- 567 Desqueyroux-Faúndez R, Soest RWM Van (1997) Shallow waters demosponges of the  
568 Galapagos Islands. *Revue Suisse de Zoologie* 104: 379–467
- 569 Diaz MC, Pomponi S, Soest R van (1993) A systematic revision of the Central West  
570 Atlantic Halichondrida (Demospongiae, Porifera). Part III. Description of valid  
571 species. *Scientia Marina* 57(4): 283–306
- 572 Erpenbeck D, Breeuwer JAJ, Parra-Velandia FJ, Soest RWM van (2006) Speculation  
573 with spiculation?—Three independent gene fragments and biochemical characters  
574 versus morphology in demosponge higher classification. *Molecular Phylogenetics*  
575 *and Evolution* 38: 293–305
- 576 Erpenbeck D, Breeuwer JAJ, Soest RWM van (2005) Implications from a 28S rRNA  
577 gene fragment for the phylogenetic relationships of halichondrid sponges (Porifera:  
578 Demospongiae). *Journal of Zoological Systematics and Evolutionary Research*  
579 43(2): 93–99
- 580 Erpenbeck D, Breeuwer JAJ, Velde HC van der, Soest RWM van (2002) Unravelling  
581 host and symbiont phylogenies of halichondrid sponges (Demospongiae, Porifera)  
582 using a mitochondrial marker. *Marine Biology* 141: 377–386

- 583 Erpenbeck D, Duran S, Rützler K, Paul VJ, Hooper JNA, Wörheide G (2007) Towards a  
584 DNA taxonomy of Caribbean demosponges: a gene tree reconstructed from partial  
585 mitochondrial CO1 gene sequences supports previous rDNA phylogenies and  
586 provides a new perspective on the systematics of Demospongiae. *Journal of the*  
587 *Marine Biological Association of the United Kingdom* 87(6): 1563–1570
- 588 Erpenbeck D, McCormack GP, Breeuwer JAJ, Soest RWM van (2004) Order level  
589 differences in the structure of partial LSU across demosponges (Porifera): new  
590 insights into an old taxon. *Molecular Phylogenetics and Evolution* 32: 388–395
- 591 Erpenbeck D, Soest RWM Van (2002) Family Halichondridae Gray, 1867. Systema  
592 Porifera: A Guide to the Classification of Sponges. pp 787–815
- 593 Erwin PM, Olson JB, Thacker RW (2011) Phylogenetic diversity, host-specificity and  
594 community profiling of sponge-associated bacteria in the northern Gulf of Mexico.  
595 *Plos One* 6(11): e26806
- 596 Folmer O, Black MB, Wr H, Vrijenhoek RC (1994) DNA primers for amplification of  
597 mitochondrial Cytochrome C oxidase subunit I from diverse metazoan invertebrates.  
598 *Molecular marine biology and biotechnology* 3(5): 294–299
- 599 Freitas FH, Siegel DA, Maritorena S, Fields E (2017) Satellite assessment of particulate  
600 matter and phytoplankton variations in the Santa Barbara Channel and its  
601 surrounding waters: Role of surface waves. *JGR Oceans* 122(1): 355–371
- 602 Fuller TL, Hughey JR (2013) Molecular investigation of the invasive sponge  
603 Hymeniacidon sinapium (de Laubenfels, 1930) in Elkhorn Slough, California.  
604 *Aquatic Invasions* 8(1): 59–66
- 605 Gastaldi M, Paula TS De, Narvarte MA, Lôbo-Hajdu G, Hajdu E (2018) Marine sponges  
606 (Porifera) from the Bahía San Antonio (North Patagonian Gulfs, Argentina), with  
607 additions to the phylogeography of the widely distributed Cliona aff. celata and  
608 Hymeniacidon perlevis, and the description of two new species. *Marine Biology*  
609 *Research* 14(7): 682–716
- 610 Goeij JM de, Oevelen D van, Vermeij MJA, Osinga R, Middelburg JJ, Goeij AFPM de,  
611 Admiraal W (2013) Surviving in a marine desert: The sponge loop retains resources  
612 within coral reefs. *Science* 342(6154): 108–110
- 613 Green KJ, Bakus GJ (1994) Taxonomic atlas of the benthic marine fauna of the Western  
614 Santa Maria Basin and the Western Santa Barbara Channel. Volume 2: The Porifera.  
615 82 pp
- 616 Henkel D, Janussen D (2011) Redescription and new records of Celtodoryx  
617 ciocalyptoides (Demospongiae: Poecilosclerida) A sponge invader in the north east

- 618 Atlantic Ocean of Asian origin? *Journal of the Marine Biological Association of the*  
619 *UK* 91: 347–355
- 620 Hoang DT, Chernomor O, Haeseler A von, Minh BQ, Vinh LS (2018) UFBoot2:  
621 Improving the ultrafast bootstrap approximation. *Molecular Biology and Evolution*  
622 35: 518–522
- 623 Hofknecht G (1978) Descriptions and Key to the Intertidal Sponges of the Puerto  
624 Peñasco Area in the Gulf of California. *Journal of the Arizona-Nevada Academy of*  
625 *Science* 13(2): 51–56
- 626 Hoshino S, Saito DS, Fujita T (2008) Contrasting genetic structure of two Pacific  
627 Hymeniacidon species. *Hydrobiologia* 603: 313–326
- 628 Jun J, Yu JN, Choi EH (2015) Complete mitochondrial genome of Hymeniacidon  
629 sinapium (Demospongiae, Halichondriidae). *Mitochondrial DNA* 26(2): 261–262
- 630 Knowlton N (1993) Sibling species in the sea. *Annual Review of Ecology and Systematics*  
631 24: 189–216
- 632 Laubenfels M de (1930) The Sponges of California. *Stanford University Bulletin* 5(98):  
633 24–29
- 634 Laubenfels M de (1932) The marine and fresh-water sponges of California. *Proceedings*  
635 *of the US National Museum* 81(4): 1–140
- 636 Lee WL, Elvin DW, Reisinger HM (2007) The Sponges of California: A Guide and Key to  
637 the Marine Sponges of California. Monterey Bay Sanctuary Foundation, 130 pp
- 638 Leigh J, Bryant D (2015) PopART: Full-feature software for haplotype network  
639 construction. *Methods in Ecology and Evolution* 6(9): 1110–1116
- 640 Letunic I, Bork P (2019) Interactive Tree Of Life (iTOL) v4: recent updates and new  
641 developments. *Nucleic Acids Research* 47(W1): W256–W259
- 642 Maldonado M (2006) The ecology of the sponge larva. *Canadian Journal of Zoology* 84:  
643 175–194
- 644 Maldonado M, Ribes M, Duyf FC van (2012) Nutrient fluxes through sponges: Biology,  
645 budgets, and ecological implications. *Advances in Marine Biology* 62: 113–182
- 646 Miller RJ, Lafferty KD, Lamy T, Kui L, Rassweiler A, Reed DC (2018) Giant kelp,  
647 *Macrocystis pyrifera*, increases faunal diversity through physical engineering.  
648 *Proceedings of the Royal Society B* 285: 20172571
- 649 Miralles L, Ardura A, Arias A, Borrell YJ, Clusa L, Dopico E, Rojas AH de, Lopez B,  
650 Muñoz-Colmenero M, Roca A, Valiente AG, Zaiko A, Garcia-Vazquez E (2016)

- 651 Barcodes of marine invertebrates from north Iberian ports: Native diversity and  
652 resistance to biological invasions. *Marine Pollution Bulletin* 112(1-2): 183–188
- 653 Montagu G (1814) An Essay on Sponges, with Descriptions of all the Species that have  
654 been discovered on the Coast of Great Britain. *Memoirs of the Wernerian Natural  
655 History Society* 2(1): 67–122
- 656 Morrow C, Cárdenas P (2015) Proposal for a revised classification of the Demospongiae  
657 (Porifera). *Frontiers in Zoology* 12(7): 1–27
- 658 Morrow CC, Redmond NE, Picton BE, Thacker RW, Collins AG, Maggs CA, Sigwart JD,  
659 Allcock AL (2013) Molecular phylogenies support homoplasy of multiple  
660 morphological characters used in the taxonomy of Heteroscleromorpha (Porifera:  
661 Demospongiae). *Integrative and Comparative Biology* 53(3): 428–446
- 662 Nguyen LT, Schmidt HA, Haeseler A von, Minh BQ (2015) IQ-TREE: A fast and  
663 effective stochastic algorithm for estimating maximum likelihood phylogenies.  
664 *Molecular Biology and Evolution* 32: 268–274
- 665 Park MH, Sim CJ, Baek J, Min GS (2007) Identification of genes suitable for DNA  
666 barcoding of morphologically indistinguishable Korean Halichondriidae sponges.  
667 *Molecules and Cells* 23(2): 220–227
- 668 Redmond NE, Morrow CC, Thacker RW, Diaz MC, Boury-Esnault N, Cárdenas P, Hajdu  
669 E, Lobo-Hajdu G, Picton BE, Pomponi SA, Kayal E, Collins AG (2013) Phylogeny  
670 and systematics of Demospongiae in light of new small-subunit ribosomal DNA  
671 (18S) sequences. *Integrative and Comparative Biology* 53(3): 388–415
- 672 Regueiras A, Alex A, Costa MS, Pereira S, Vasconcelos V (2019) Diversity of intertidal  
673 marine sponges from the western coast of Portugal (North-east Atlantic). *Journal of  
674 the Marine Biological Association of the United Kingdom* 99(6): 1253–1265
- 675 Reiswig HM (1971) Particle feeding in natural populations of three marine Demosponges.  
676 *Biological Bulletin* 141(3): 568–591
- 677 Rot C, Goldfarb I, Ilan M, Huchon D (2006) Putative cross-kingdom horizontal gene  
678 transfer in sponge (Porifera) mitochondria. *BMC Evolutionary Biology* 6: 71
- 679 Ruiz GM, Fofonoff PW, Carlton JT, Wonham MJ, Hines AH (2000) Invasion of coastal  
680 marine communities in North America: Apparent patterns, processes, and biases.  
681 *Annual Reviews of Ecology and Systematics* 31: 481–531
- 682 Samaai T, Gibbons MJ (2005) Demospongiae taxonomy and biodiversity of the Benguela  
683 region on the west coast of South Africa. *African Natural History* 1: 1–96
- 684 Schneider CA, Rasband WS, Eliceiri KW (2012) NIH Image to ImageJ: 25 years of



- 685 image analysis. *Nature methods* 9(7): 671–675
- 686 Sim CJ (1985) A systematic study on the marine sponges from the South Sea and the  
687 Yellow Sea of Korea. *Korean Journal of Systematic Zoology* 1: 21–30
- 688 Sim CJ, Bakus GJ (1986) Marine sponges of Santa Catalina Island, California. *Allan*  
689 *Hancock Foundation Occasional Papers (New Series)* 5: 1–23
- 690 Sim CJ, Lee KJ (2003) A new species of the genus hymeniacidon (Demospongiae:  
691 Halichondrida: Halichondriidae) from Korea. *Korean Journal of Biological Sciences*  
692 7(3): 187–189
- 693 R.W.M. Van Soest, N. Boury-Esnault, J.N.A. Hooper, K. Rützler, N.J. de Voogd, B.  
694 Alvarez, E. Hajdu, A.B. Pisera, R. Manconi, C. Schönberg, M. Klautau, M. Kelly, J.  
695 Vacelet, M. Dohrmann, M.-C. Díaz, P. Cárdenas, J.L. Carballo, P. Ríos, R. Downey,  
696 C.C. Morrow World Porifera Database. Hymeniacidon Perlevis (Montagu, 1814)  
697 (2020a). World Porifera Database.
- 698 R.W.M. Van Soest, N. Boury-Esnault, J.N.A. Hooper, K. Rützler, N.J. de Voogd, B.  
699 Alvarez, E. Hajdu, A.B. Pisera, R. Manconi, C. Schönberg, M. Klautau, M. Kelly, J.  
700 Vacelet, M. Dohrmann, M.-C. Díaz, P. Cárdenas, J.L. Carballo, P. Ríos, R. Downey,  
701 C.C. Morrow World Porifera Database. Hymeniacidon Luxurians (Lieberkühn,  
702 1859) (2020b).
- 703 R.W.M. Van Soest, N. Boury-Esnault, J.N.A. Hooper, K. Rützler, N.J. de Voogd, B.  
704 Alvarez, E. Hajdu, A.B. Pisera, R. Manconi, C. Schönberg, M. Klautau, M. Kelly, J.  
705 Vacelet, M. Dohrmann, M.-C. Díaz, P. Cárdenas, J.L. Carballo, P. Ríos, R. Downey,  
706 C.C. Morrow World Porifera Database. Hymeniacidon Heliophila (Wilson, 1911)  
707 (2020c).
- 708 Steneck RS, Graham MH, Bourque BJ, Corbett D, Erlandson JM, Estes JA, Tegner MJ  
709 (2002) Kelp forest ecosystems: biodiversity, stability, resilience and future.  
710 *Environmental Conservation* 29(4): 436–459
- 711 Thacker RW, Hill AL, Hill MS, Redmond NE, Collins AG, Morrow CC, Spicer L,  
712 Carmack CA, Zappe ME, Pohlmann D, Hall C, Diaz MC, Bangalore P V. (2013)  
713 Nearly complete 28S rRNA gene sequences confirm new hypotheses of sponge  
714 evolution. *Integrative and Comparative Biology* 53(3): 373–387
- 715 Thiele J (1905) Die Kiesel- und Hornschwämme der Sammlung Plate. 407-496 pp
- 716 Trifinopoulos J, Nguyen LT, Haeseler A von, Minh BQ (2016) W-IQ-TREE: a fast  
717 online phylogenetic tool for maximum likelihood analysis. *Nucleic Acids Research*  
718 44(W1): W232–W235

- 719 Turque AS, Cardoso AM, Silveira CB, Vieira RP, Freitas FAD, Albano RM, Gonzalez  
720 AM, Paranhos R, Muricy G, Martins OB (2008) Bacterial communities of the  
721 marine sponges *Hymeniacidon heliophila* and *Polymastia janeirensis* and their  
722 environment in Rio de Janeiro. *Marine Biology* 155: 135–146
- 723 Wasson K, Zabin CJ, Bedinger L, Diaz MC, Pearse JS (2001) Biological invasions of  
724 estuaries without international shipping: the importance of intraregional transport.  
725 *Biological Conservation* 102: 143–153
- 726 Watson JR, Mitarai S, Siegel DA, Caselle JE, Dong C, McWilliams JC (2010) Realized  
727 and potential larval connectivity in the Southern California Bight. *Marine Ecology*  
728 *Progress Series* 401: 31–48
- 729 Weigel BL, Erwin PM (2016) Intraspecific variation in microbial symbiont communities  
730 of the sun sponge, *Hymeniacidon heliophila*, from intertidal and subtidal habitats.  
731 *Applied and Environmental Microbiology* 82: 650–658
- 732 Wilson H V. (1911) Development of sponges from dissociated tissue cells. *Bulletin of the*  
733 *Bureau of Fisheries* 30: 1–30
- 734 Xavier JR, Rachello-Dolmen PG, Parra-Velandia F, Schönberg CHL, Breeuwer JAJ,  
735 Soest RWM van (2010) Molecular evidence of cryptic speciation in the  
736 “cosmopolitan” excavating sponge *Cliona celata* (Porifera, Clionidae). *Molecular*  
737 *Phylogenetics and Evolution* 56: 13–20
- 738 Xue L, Zhang X, Zhang W (2009) Larval release and settlement of the marine sponge  
739 *Hymeniacidon perlevis* (Porifera, Demospongiae) under controlled laboratory  
740 conditions. *Aquaculture* 290: 132–139
- 741
- 742
- 743
- 744

745 **Table 1. Morphological data from newly collected samples with comparison data**  
 746 **from the literature.**  
 747

| Sample                            | Date    | Collection location | N  | Style length    | Style width |
|-----------------------------------|---------|---------------------|----|-----------------|-------------|
| TLT550                            | 1/7/20  | Arroyo Quemado      | 25 | 151 - 262 - 336 | 3 - 5 - 7   |
| TLT79                             | 7/1/19  | Tajigus             | 26 | 121 - 223 - 322 | 3 - 5 - 7   |
| TLT87                             | 7/1/19  | Tajigus             | 21 | 147 - 216 - 326 | 2 - 5 - 8   |
| TLT109                            | 7/1/19  | Tajigus             | 32 | 138 - 289 - 415 | 4 - 6 - 8   |
| TLT339                            | 8/30/19 | Coal Oil Point      | 25 | 160 - 283 - 376 | 2 - 5 - 6   |
| TLT247                            | 7/31/19 | Carpinteria         | 20 | 129 - 223 - 319 | 4 - 5 - 7   |
| TLT129                            | 7/31/19 | Carpinteria         | 36 | 116 - 246 - 334 | 3 - 5 - 7   |
| TLT15955                          | 8/22/19 | Redondo Barge       | 25 | 127 - 235 - 407 | 3 - 5 - 7   |
| TLT349                            | 8/23/19 | Resort Wall         | 23 | 163 - 264 - 351 | 2 - 5 - 12  |
| <i>H. sinapium</i> <sup>1</sup>   | -       | Elkhorn Slough, CA  | -  | 115 - 460       | 3 - 12      |
| <i>H. perlevis</i> <sup>2</sup>   | -       | Wales               | -  | 152 - 475       | 3 - 12      |
| <i>H. perlevis</i> <sup>3</sup>   | -       | South Africa        | -  | 155 - 337       | 7           |
| <i>H. perlevis</i> <sup>4</sup>   | -       | New Zealand         | -  | 189 - 329       | 2 - 10      |
| <i>H. heliophila</i> <sup>5</sup> | -       | Caribbean           | -  | 130 - 450       | 3 - 10      |
| <i>H. fernandezi</i> <sup>6</sup> | -       | Chile               | -  | 200 - 340       | 3 - 10      |

748 Date = collection date, N = number of spicules measured, spicule dimensions given in  
 749 format min - mean - max; when only two numbers are shown they are min - max.  
 750 Sources: 1: Lee et al. 2007; 2: Erpenback & Van Soest 2002; 3: Samaai & Gibbons 2005;  
 751 4: Bergquist 1970; 6: Thiele 1905.  
 752

753 **Figure 1.** Collection locations in the Southern California Channel Islands region. Sites  
754 where *H. sinapium* were found (black) and not found (white) are shown. The two sites  
755 away from the coastline are oil platforms. Collection sites in Central California are not  
756 shown.  
757

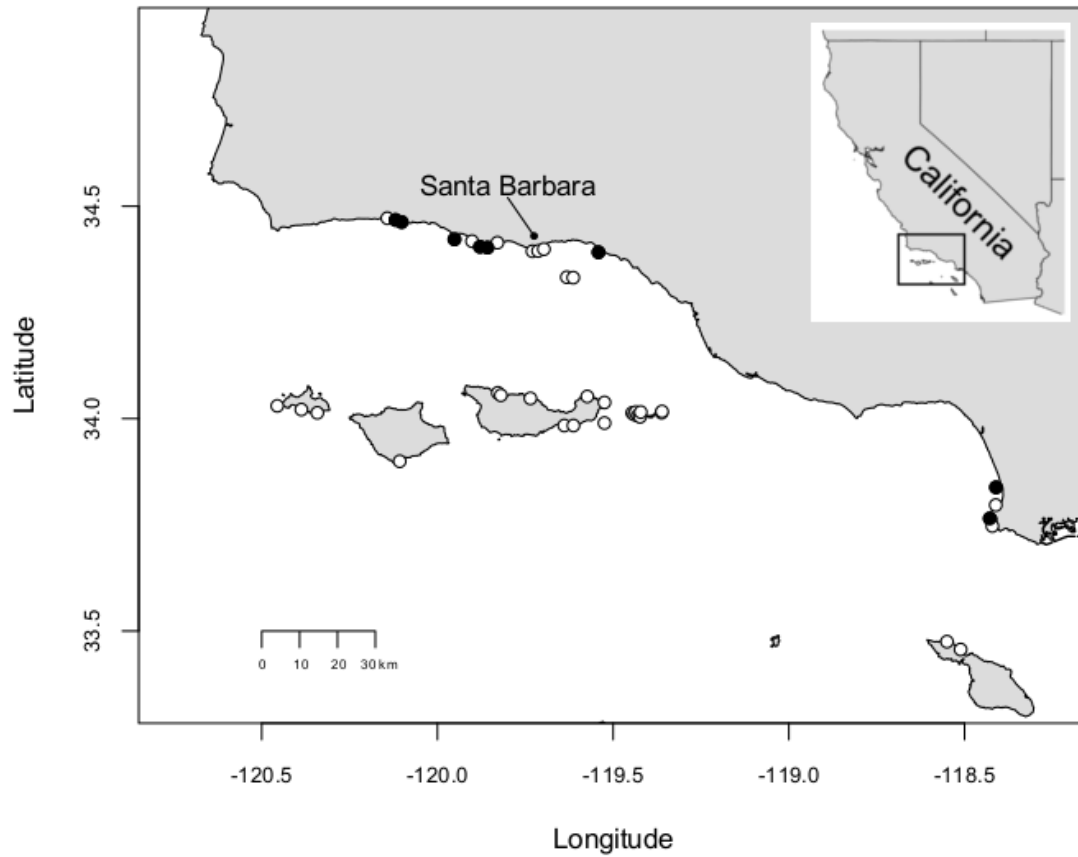

758  
759  
760  
761

762 **Figure 2.** Minimum-spanning haplotype networks for three loci. Samples are coded by  
763 collection location, regardless of whether they were identified as *H. perlevis*, *H. sinapium*,  
764 or *H. heliophila*. Closely related *H. flavia* are shown for comparison where available; all  
765 data for this species is from Japan and Korea.  
766

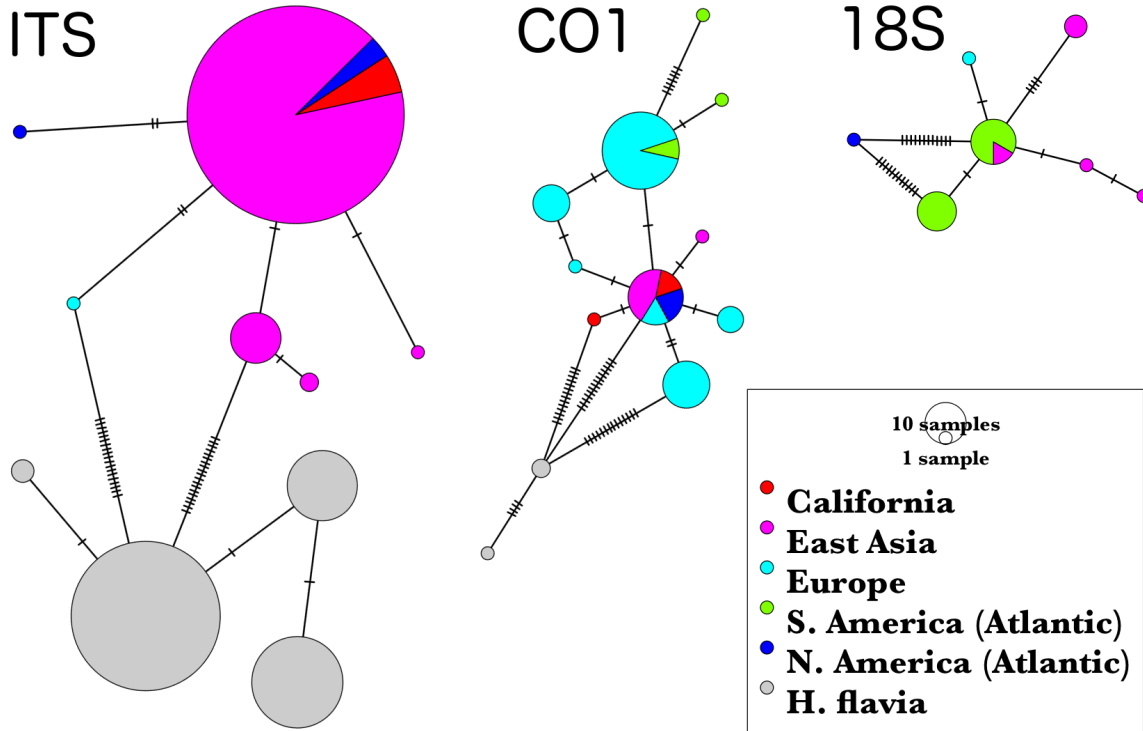

767  
768  
769  
770  
771

772 **Figure 3.** Phylogenies for the 18S and 28S loci. All samples identified as *H. perlevis*, *H.*  
 773 *sinapium* and *H. heliophila* are shown in bold with localities. Selected other  
 774 Halichondridae are shown for comparison, with *Suberites domuncula* specified as the  
 775 outgroup. Genbank accession numbers are also shown. Ultrafast Bootstrap support is  
 776 shown for all nodes with > 50% support.  
 777

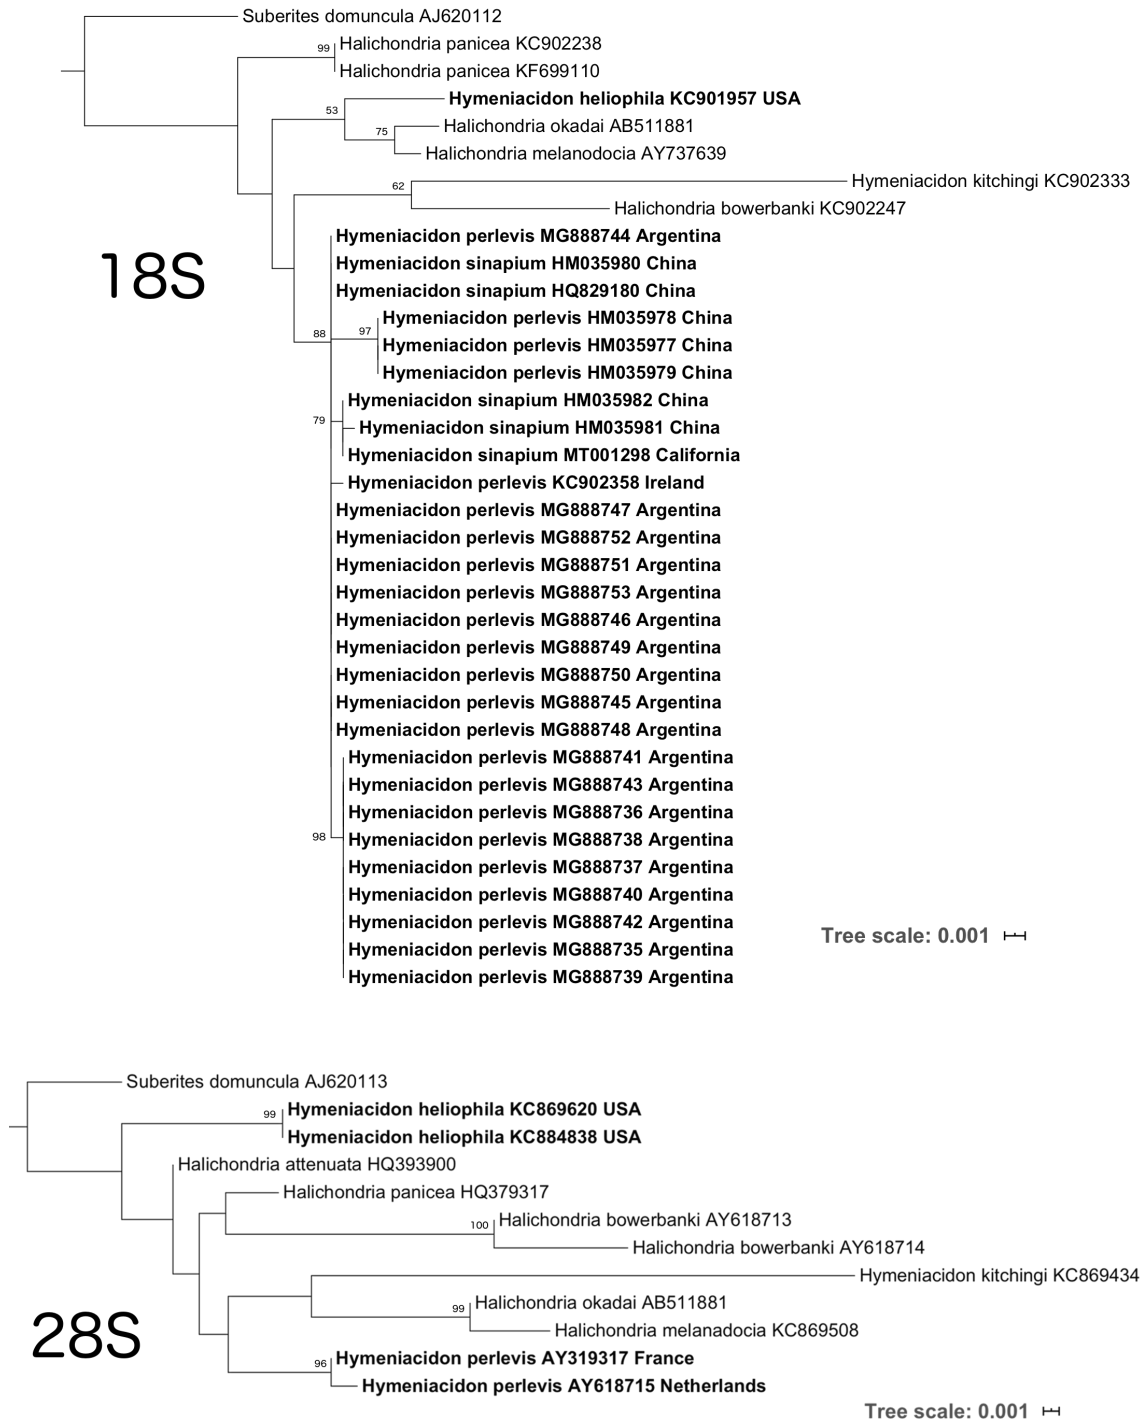

778  
779

782
